# Supplementary material
Source: PubMed Central journal article supplement (PMC8532041)
Supplement: jamaoncol-e214932-s001.pdf [file jamaoncol-e214932-s001.pdf]

## Supplemental Online Content

Ganti AK, Klein AB, Cotarla I, Seal B, Chou E. Update of incidence, prevalence, survival, and initial treatment in patients with non–small cell lung cancer in the US. *JAMA Oncol*. Published online October 21, 2021. doi:10.1001/jamaoncol.2021.4932

### eMethods

**eTable 1.** Incidence of NSCLC in the US by Histology 2010-2017

**eTable 2.** Incidence of NSCLC in the US, 2010-2017

**eTable 3.** Incidence of NSCLC in the US by Stage (Overall and Age Stratified), 2010-2017

**eTable 4.** Prevalence of NSCLC in the US, 2010-2016 (Unadjusted)

**eTable 5.** Initial Treatment for NSCLC (SEER-18, 2016)

**eTable 6.** Initial treatment by stage and by age

**eTable 7.** Incidence of Stage I NSCLC in patients  $\geq 65$  years of age and Medicare Part B CT scan proportions

This supplemental material has been provided by the authors to give readers additional information about their work.

## eMethods

### Databases

The USCS database consists of population-based cancer registry data collected by the National Cancer Institute's (NCI) SEER program and the Centers for Disease Control and Prevention's (CDC) National Program of Cancer Registries (NPCR).<sup>1</sup> The SEER program collects reportable cancer cases from multiple geographic areas (including states not represented in NPCR) and, based on the number of registries included in the grouping (e.g., SEER-9, SEER-13, SEER-18, and SEER-21), covers up to 34.6% of the US population.<sup>2</sup> NPCR supports central cancer registries in 46 states and several US territories representing >95% of the US population.<sup>3</sup> Collectively, the databases in USCS (i.e., SEER-NPCR) provide information on newly diagnosed cancer across the entire US population.<sup>4</sup> The SEER-18 database, which represents ~28% of the US population,<sup>5</sup> was utilized to obtain detailed information that was not available in the SEER-NPCR dataset or other SEER registries (i.e., month-year of diagnosis,<sup>6</sup> staging,<sup>6,7</sup> survival,<sup>7</sup> and initial treatment).<sup>6</sup>

The most current registry data come from the November 2019 NPCR and SEER submissions, which include cancer cases diagnosed through 2017. The SEER program allows a standard delay of up to 22 months (e.g., cancer cases diagnosed in February 2017 may not be reported to NCI until December 2018).<sup>8</sup> All new cases submitted by November of each year are included in the official data release in April of the following year; in a typical year, there can be a ~0.5- to >2.5-year gap from original diagnosis to data release. In 2020, data release for some measures was delayed from April to June, with some measures not yet released. At the time of this analysis, incidence data were available through 2017, while other data (month-year of diagnosis [used to calculate prevalence], survival month, and initial treatment) were available through 2016.<sup>6,7</sup>

## Calculation of Period Survival Estimates

Suppose 5-year survival is to be calculated using data from 2008-2013, consisting of patients with index cancer diagnoses from 2008-2012. Traditional cohort 5-year survival is obtained from only the 2008 cohort and equals the product of conditional probabilities of patients surviving the next year, given that they survived the previous year. In contrast, 5-year period survival is obtained by multiplying the 1-year survival probabilities of the cohort diagnosed in 2012 by each year's most recent conditional (given the preceding year's survival) probability of surviving the next year (e.g. the probability of surviving 2 years given 1-year survival from the cohort diagnosed in 2011).

## eReferences

1. U.S. Cancer Statistics Working Group. United States Cancer Statistics: 1999–2017. Incidence and mortality Web-based report. Atlanta, GA: U.S. Department of Health and Human Services, CDC, National Cancer Institute; 2020. Available at [www.cdc.gov/uscs/](http://www.cdc.gov/uscs/). Accessed July 20, 2020.
2. National Cancer Institute. Surveillance, Epidemiology, and End Results Program. Number of Persons by Race and Hispanic Ethnicity for SEER Participants (2010 Census Data). Available at: <https://seer.cancer.gov/registries/data.html>. Accessed June 19, 2020.
3. Centers for Disease Control and Prevention. National Program of Cancer Registries (NPCR). Available at: <https://www.cdc.gov/cancer/npcr/about.htm>. Accessed June 29, 2020.
4. NPCR and SEER – US Cancer statistics public use database. Available at: <https://www.cdc.gov/cancer/uscs/public-use/pdf/uscs-public-use-database-fact-sheet-508.pdf>. Accessed June 8, 2020.
5. National Cancer Institute. Surveillance, Epidemiology, and End Results Program. SEER\*Stat Databases: November 2019 Submission. Available at: <https://seer.cancer.gov/data-software/documentation/seerstat/nov2019/>. Accessed July 27, 2020.

6. National Program of Cancer Registries and Surveillance, Epidemiology, and End Results  
SEER\*Stat Database: Incidence – SEER Regs Custom Data (with additional treatment fields), Nov 2018 Sub (2000–2016), United States Department of Health and Human Services, Centers for Disease Control and Prevention and National Cancer Institute. Released April 2019. Available at [www.cdc.gov/cancer/public-use](http://www.cdc.gov/cancer/public-use).
7. National Program of Cancer Registries and Surveillance, Epidemiology, and End Results  
SEER\*Stat Database: Incidence – SEER Research Data, 18 Registries, Nov 2019 Sub (2000–2017), United States Department of Health and Human Services, Centers for Disease Control and Prevention and National Cancer Institute. Released April 2020. Available at [www.cdc.gov/cancer/public-use](http://www.cdc.gov/cancer/public-use).
8. National Cancer Institute. Division of Cancer Control & Population Sciences. Cancer incidence rates adjusted for reporting delay. Available at: <https://surveillance.cancer.gov/delay/>. Accessed July 29, 2020.

### Morphology codes

The following morphology codes from the International Classification of Disease for Oncology, 3<sup>rd</sup> edition (ICD-O-3) were used to identify NSCLC:

|                                   | ICD-O-3 codes                                                                                                                                                                            |
|-----------------------------------|------------------------------------------------------------------------------------------------------------------------------------------------------------------------------------------|
| <b>Non-small-cell lung cancer</b> |                                                                                                                                                                                          |
| <b>Squamous cell carcinoma</b>    | 8051–8052, 8070-8076, 8078, 8083-8084, 8090, 8094, 8123                                                                                                                                  |
| <b>Adenocarcinoma</b>             | 8015, 8050, 8140-8141, 8143-8145, 8147, 8190, 8201, 8211, 8250-8255, 8260, 8290, 8310, 8320, 8323, 8333, 8401, 8440, 8470-8471, 8480-8481, 8490, 8503, 8507, 8550, 8570-8572, 8574, 8576 |
| <b>Large cell carcinoma</b>       | 8012–8014, 8021, 8034, 8082                                                                                                                                                              |
| <b>Not otherwise specified</b>    | 8046, 8003–8004, 8022, 8030, 8031-8033, 8035, 8120, 8200, 8240–8241, 8243–8246, 8249, 8430, 8525, 8560, 8562, 8575                                                                       |
| <b>Small-cell lung cancer</b>     | 8002, 8041–8045                                                                                                                                                                          |

## Data tables

eTable 1. Incidence of NSCLC in the US by Histology 2010-2017

|                                 | SEER-18   |         |                    | SEER-NPCR |           |               |
|---------------------------------|-----------|---------|--------------------|-----------|-----------|---------------|
|                                 | Incidence | N       | SEER-18 Population | Incidence | N         | US Population |
| <b>Overall (2010–2017)</b>      |           |         |                    |           |           |               |
| Lung carcinoma                  | 47.8      | 366,213 | 706,307,921        | 52.5      | 1,542,070 | 2,538,185,596 |
| Small-cell                      | 6.1       | 47,233  | 706,307,921        | 7.2       | 215,522   | 2,538,185,596 |
| Non-small-cell                  | 40.3      | 308,192 | 706,307,921        | 43.8      | 1,281,780 | 2,538,185,596 |
| Squamous cell                   | 11.2      | 84,928  | 706,307,921        | 12.9      | 376,413   | 2,538,185,596 |
| Adenocarcinoma                  | 23.0      | 176,091 | 706,307,921        | 23.9      | 701,768   | 2,538,185,596 |
| Large cell                      | 0.7       | 5,432   | 706,307,921        | 0.8       | 23,686    | 2,538,185,596 |
| NOS                             | 5.5       | 41,741  | 706,307,921        | 6.2       | 179,870   | 2,538,185,596 |
| Carcinoma, NOS                  | 1.4       | 10,788  | 706,307,921        | 1.5       | 44,768    | 2,538,185,596 |
| Sarcomas                        | 0.1       | 648     | 706,307,921        | 0.1       | 2,329     | 2,538,185,596 |
| Other specified types           | 0.0       | 333     | 706,307,921        | 0         | 1,266     | 2,538,185,596 |
| Total                           | 47.9      | 367,194 | 706,307,921        | 52.7      | 1,545,665 | 2,538,185,596 |
| <b>Age &lt;65 y (2010–2017)</b> |           |         |                    |           |           |               |
| Lung carcinoma                  | 15.1      | 117,365 | 612,378,397        | 17.8      | 510,349   | 2,174,723,820 |
| Small-cell                      | 2.2       | 17,081  | 612,378,397        | 2.8       | 80,047    | 2,174,723,820 |
| Non-small-cell                  | 12.5      | 97,202  | 612,378,397        | 14.6      | 417,532   | 2,174,723,820 |
| Squamous cell                   | 2.7       | 21,832  | 612,378,397        | 3.4       | 100,443   | 2,174,723,820 |
| Adenocarcinoma                  | 7.6       | 58,519  | 612,378,397        | 8.6       | 242,945   | 2,174,723,820 |
| Large cell                      | 0.3       | 2,106   | 612,378,397        | 0.3       | 9,368     | 2,174,723,820 |
| NOS                             | 1.9       | 14,745  | 612,378,397        | 2.3       | 64,764    | 2,174,723,820 |
| Carcinoma, NOS                  | 0.4       | 3,082   | 612,378,397        | 0.4       | 12,770    | 2,174,723,820 |
| Sarcomas                        | 0.0       | 292     | 612,378,397        | 0         | 1,086     | 2,174,723,820 |
| Other specified types           | 0.0       | 130     | 612,378,397        | 0         | 540       | 2,174,723,820 |
| Total                           | 15.1      | 117,787 | 612,378,397        | 17.9      | 511,975   | 2,174,723,820 |
| <b>Age ≥65 y (2010–2017)</b>    |           |         |                    |           |           |               |
| Lung carcinoma                  | 274.2     | 248,848 | 93,929,524         | 292.5     | 1,031,721 | 363,461,776   |
| Small-cell                      | 33.0      | 30,152  | 93,929,524         | 38.1      | 135,475   | 363,461,776   |
| Non-small-cell                  | 232.8     | 210,990 | 93,929,524         | 245.4     | 864,248   | 363,461,776   |
| Squamous cell                   | 70.0      | 63,096  | 93,929,524         | 78.7      | 275,970   | 363,461,776   |
| Adenocarcinoma                  | 129.5     | 117,572 | 93,929,524         | 130       | 458,823   | 363,461,776   |
| Large cell                      | 3.7       | 3,326   | 93,929,524         | 4         | 14,318    | 363,461,776   |
| NOS                             | 29.7      | 26,996  | 93,929,524         | 32.6      | 115,106   | 363,461,776   |
| Carcinoma, NOS                  | 8.5       | 7,706   | 93,929,524         | 9.1       | 31,998    | 363,461,776   |
| Sarcomas                        | 0.4       | 356     | 93,929,524         | 0.4       | 1,243     | 363,461,776   |
| Other specified types           | 0.2       | 203     | 93,929,524         | 0.2       | 726       | 363,461,776   |
| Total                           | 274.8     | 249,407 | 93,929,524         | 293.0     | 1,033,690 | 363,461,776   |
| <b>Men (2010–2017)</b>          |           |         |                    |           |           |               |
| Lung carcinoma                  | 55.4      | 190,217 | 348,646,337        | 61.1      | 808,689   | 1,249,021,622 |
| Small-cell                      | 6.6       | 23,394  | 348,646,337        | 7.8       | 106,050   | 1,249,021,622 |
| Non-small-cell                  | 47.0      | 160,784 | 348,646,337        | 51.3      | 677,549   | 1,249,021,622 |
| Squamous cell                   | 15.6      | 52,716  | 348,646,337        | 17.9      | 234,332   | 1,249,021,622 |
| Adenocarcinoma                  | 24.3      | 83,581  | 348,646,337        | 25.4      | 336,622   | 1,249,021,622 |
| Large cell                      | 0.9       | 3,061   | 348,646,337        | 1.0       | 13,503    | 1,249,021,622 |
| NOS                             | 6.2       | 21,426  | 348,646,337        | 7.0       | 93,073    | 1,249,021,622 |
| Carcinoma, NOS                  | 1.8       | 6,039   | 348,646,337        | 1.9       | 25,090    | 1,249,021,622 |

|                          |      |         |             |      |         |               |
|--------------------------|------|---------|-------------|------|---------|---------------|
| Sarcomas                 | 0.1  | 383     | 348,646,337 | 0.1  | 1,337   | 1,249,021,622 |
| Other specified types    | 0.1  | 188     | 348,646,337 | 0.1  | 735     | 1,249,021,622 |
| Total                    | 55.5 | 190,788 | 348,646,337 | 61.2 | 810,761 | 1,249,021,622 |
| <b>Women (2010–2017)</b> |      |         |             |      |         |               |
| Lung carcinoma           | 42.1 | 175,996 | 357,661,584 | 46.1 | 733,381 | 1,289,163,974 |
| Small-cell               | 5.6  | 23,839  | 357,661,584 | 6.8  | 109,472 | 1,289,163,974 |
| Non-small-cell           | 35.3 | 147,408 | 357,661,584 | 38.0 | 604,231 | 1,289,163,974 |
| Squamous cell            | 7.8  | 32,212  | 357,661,584 | 9.0  | 142,081 | 1,289,163,974 |
| Adenocarcinoma           | 22.1 | 92,510  | 357,661,584 | 22.9 | 365,146 | 1,289,163,974 |
| Large cell               | 0.6  | 2,371   | 357,661,584 | 0.6  | 10,183  | 1,289,163,974 |
| NOS                      | 4.9  | 20,315  | 357,661,584 | 5.5  | 86,797  | 1,289,163,974 |
| Carcinoma, NOS           | 1.1  | 4,749   | 357,661,584 | 1.2  | 19,678  | 1,289,163,974 |
| Sarcomas                 | 0.1  | 265     | 357,661,584 | 0.1  | 992     | 1,289,163,974 |
| Other specified types    | 0.0  | 145     | 357,661,584 | 0.0  | 531     | 1,289,163,974 |
| Total                    | 42.2 | 176,406 | 357,661,584 | 46.2 | 734,904 | 1,289,163,974 |

Incidence per 100,000 persons, age-adjusted to the 2000 US Standard Population (19 age groups - Census P25-1130).

NOS, not otherwise specified; NSCLC, non-small-cell lung cancer; US, United States; y, years.

eTable 2. Incidence of NSCLC in the US, 2010-2017

|                                 | SEER-18   |         |                    | SEER-NPCR |           |                            |
|---------------------------------|-----------|---------|--------------------|-----------|-----------|----------------------------|
|                                 | Incidence | N       | SEER 18 Population | Incidence | N         | US Population <sup>a</sup> |
| <b>Overall (2010–2017)</b>      | 40.3      | 308,192 | 706,307,921        | 43.8      | 1,281,780 | 2,538,185,596              |
| 2010                            | 43.6      | 37,903  | 86,141,302         | 46.4      | 155,348   | 309,326,085                |
| 2011                            | 42.7      | 38,066  | 86,786,305         | 45.8      | 156,713   | 311,580,009                |
| 2012                            | 41.8      | 38,261  | 87,413,119         | 45.0      | 158,337   | 313,874,218                |
| 2013                            | 40.7      | 38,327  | 88,004,080         | 44.4      | 159,958   | 316,057,727                |
| 2014                            | 39.9      | 38,561  | 88,617,533         | 43.6      | 161,258   | 318,386,421                |
| 2015                            | 39.2      | 38,852  | 89,232,342         | 42.9      | 162,920   | 320,742,673                |
| 2016                            | 38.4      | 39,002  | 89,814,929         | 42.0      | 163,530   | 323,071,342                |
| 2017                            | 37.5      | 39,220  | 90,298,311         | 40.9      | 163,716   | 325,147,121                |
| <b>Age &lt;65 y (2010–2017)</b> | 12.5      | 97,202  | 612,378,397        | 14.6      | 417,532   | 2,174,723,820              |
| 2010                            | 13.5      | 12,349  | 75,737,114         | 15.5      | 52,453    | 268,847,303                |
| 2011                            | 13.3      | 12,558  | 76,128,974         | 15.2      | 52,820    | 270,227,060                |
| 2012                            | 12.9      | 12,303  | 76,283,517         | 15.0      | 52,463    | 270,738,079                |
| 2013                            | 12.6      | 12,194  | 76,471,427         | 14.8      | 52,354    | 271,419,209                |
| 2014                            | 12.4      | 12,145  | 76,676,251         | 14.5      | 52,211    | 272,216,636                |
| 2015                            | 12.1      | 12,078  | 76,880,727         | 14.4      | 52,515    | 273,074,977                |
| 2016                            | 11.8      | 11,934  | 77,058,461         | 14.0      | 51,921    | 273,847,358                |
| 2017                            | 11.4      | 11,641  | 77,141,926         | 13.5      | 50,795    | 274,353,198                |
| <b>Age ≥65 y (2010–2017)</b>    | 232.8     | 210,990 | 93,929,524         | 245.4     | 864,248   | 363,461,776                |
| 2010                            | 251.8     | 25,554  | 10,404,188         | 259.9     | 102,895   | 40,478,782                 |
| 2011                            | 245.8     | 25,508  | 10,657,331         | 257.2     | 103,893   | 41,352,949                 |
| 2012                            | 241.3     | 25,958  | 11,129,602         | 252.8     | 105,874   | 43,136,139                 |
| 2013                            | 235.0     | 26,133  | 11,532,653         | 249.0     | 107,604   | 44,638,518                 |
| 2014                            | 230.0     | 26,416  | 11,941,282         | 244.5     | 109,047   | 46,169,785                 |
| 2015                            | 226.1     | 26,774  | 12,351,615         | 240.3     | 110,405   | 47,667,696                 |
| 2016                            | 221.9     | 27,068  | 12,756,468         | 235.8     | 111,609   | 49,223,984                 |
| 2017                            | 217.9     | 27,579  | 13,156,385         | 230       | 112,921   | 50,793,923                 |
| <b>Men (2010–2017)</b>          | 47        | 160,784 | 348,646,337        | 51.3      | 677,549   | 1,249,021,622              |
| 2010                            | 52.6      | 20,309  | 42,502,679         | 56.0      | 83,809    | 152,077,018                |
| 2011                            | 50.8      | 20,170  | 42,818,861         | 54.9      | 84,270    | 153,211,825                |
| 2012                            | 49.3      | 20,178  | 43,137,519         | 53.5      | 84,456    | 154,396,283                |
| 2013                            | 47.5      | 20,071  | 43,433,326         | 52.2      | 84,902    | 155,514,347                |
| 2014                            | 46.0      | 19,969  | 43,744,472         | 51.0      | 85,243    | 156,697,642                |
| 2015                            | 45.2      | 20,153  | 44,059,074         | 49.7      | 85,428    | 157,910,775                |
| 2016                            | 43.6      | 19,973  | 44,353,041         | 48.1      | 84,970    | 159,088,102                |
| 2017                            | 42.4      | 19,961  | 44,597,365         | 46.5      | 84,471    | 160,125,630                |
| <b>Female (2010–2017)</b>       | 35.3      | 147,408 | 357,661,584        | 38        | 604,231   | 1,289,163,974              |
| 2010                            | 36.8      | 17,594  | 43,638,623         | 39.1      | 71,539    | 157,249,067                |
| 2011                            | 36.6      | 17,896  | 43,967,444         | 38.8      | 72,443    | 158,368,184                |
| 2012                            | 36.1      | 18,083  | 44,275,600         | 38.6      | 73,881    | 159,477,935                |
| 2013                            | 35.6      | 18,256  | 44,570,754         | 38.4      | 75,056    | 160,543,380                |
| 2014                            | 35.3      | 18,592  | 44,873,061         | 37.9      | 76,015    | 161,688,779                |
| 2015                            | 34.6      | 18,699  | 45,173,268         | 37.7      | 77,492    | 162,831,898                |
| 2016                            | 34.4      | 19,029  | 45,461,888         | 37.3      | 78,560    | 163,983,240                |
| 2017                            | 33.8      | 19,259  | 45,700,946         | 36.6      | 79,245    | 165,021,491                |

Incidence per 100,000 persons, age-adjusted to the 2000 US Standard Population (19 age groups - Census P25-1130). NSCLC, non-small-cell lung cancer; US, United States; y, years. <sup>a</sup>Based on SEER-NPCR



**eTable 3. Incidence of NSCLC in the US by Stage (Overall and Age Stratified), 2010-2017**

|                   | SEER-18   |        |                    | SEER-18 Incidence projected to US population |       |                            |
|-------------------|-----------|--------|--------------------|----------------------------------------------|-------|----------------------------|
|                   | Incidence | N      | SEER 18 Population | Incidence                                    | N     | US Population <sup>a</sup> |
| <b>Stage I</b>    |           |        |                    |                                              |       |                            |
| 2010              | 9.8       | 8,439  | 86,141,302         | 10.77                                        | 33313 | 309326085                  |
| 2011              | 9.9       | 8,652  | 86,786,305         | 10.91                                        | 33978 | 311580009                  |
| 2012              | 9.7       | 8,768  | 87,413,119         | 10.96                                        | 34401 | 313874218                  |
| 2013              | 9.9       | 9,152  | 88,004,080         | 11.38                                        | 35962 | 316057727                  |
| 2014              | 9.8       | 9,347  | 88,617,533         | 11.51                                        | 36631 | 318386421                  |
| 2015              | 10.2      | 10,013 | 89,232,342         | 12.22                                        | 39192 | 320742673                  |
| 2016              | 10.3      | 10,386 | 89,814,929         | 12.61                                        | 40746 | 323071342                  |
| 2017              | 10.5      | 10,946 | 90,298,311         | 13.17                                        | 42838 | 325147121                  |
| <b>Stage II</b>   |           |        |                    |                                              |       |                            |
| 2010              | 3.9       | 3,333  | 86,141,302         | 4.25                                         | 13149 | 309326085                  |
| 2011              | 3.9       | 3,432  | 86,786,305         | 4.33                                         | 13504 | 311580009                  |
| 2012              | 3.7       | 3,324  | 87,413,119         | 4.16                                         | 13050 | 313874218                  |
| 2013              | 3.7       | 3,413  | 88,004,080         | 4.21                                         | 13307 | 316057727                  |
| 2014              | 3.5       | 3,318  | 88,617,533         | 4.1                                          | 13050 | 318386421                  |
| 2015              | 3.4       | 3,312  | 89,232,342         | 4.05                                         | 12980 | 320742673                  |
| 2016              | 3.2       | 3,262  | 89,814,929         | 3.96                                         | 12807 | 323071342                  |
| 2017              | 3.0       | 3,121  | 90,298,311         | 3.75                                         | 12207 | 325147121                  |
| <b>Stage IIIA</b> |           |        |                    |                                              |       |                            |
| 2010              | 5.3       | 4,657  | 86,141,302         | 5.91                                         | 18268 | 309326085                  |
| 2011              | 5.4       | 4,765  | 86,786,305         | 5.99                                         | 18673 | 311580009                  |
| 2012              | 5.2       | 4,804  | 87,413,119         | 5.98                                         | 18781 | 313874218                  |
| 2013              | 5.0       | 4,678  | 88,004,080         | 5.79                                         | 18313 | 316057727                  |
| 2014              | 5.0       | 4,831  | 88,617,533         | 5.94                                         | 18899 | 318386421                  |
| 2015              | 4.8       | 4,739  | 89,232,342         | 5.77                                         | 18494 | 320742673                  |
| 2016              | 4.7       | 4,830  | 89,814,929         | 5.84                                         | 18863 | 323071342                  |
| 2017              | 4.7       | 4,953  | 90,298,311         | 5.93                                         | 19273 | 325147121                  |
| <b>Stage IIIB</b> |           |        |                    |                                              |       |                            |
| 2010              | 2.3       | 2,022  | 86,141,302         | 2.54                                         | 7849  | 309326085                  |
| 2011              | 2.3       | 2,121  | 86,786,305         | 2.64                                         | 8216  | 311580009                  |
| 2012              | 2.3       | 2,138  | 87,413,119         | 2.64                                         | 8299  | 313874218                  |
| 2013              | 2.1       | 2,041  | 88,004,080         | 2.51                                         | 7943  | 316057727                  |
| 2014              | 2.2       | 2,111  | 88,617,533         | 2.56                                         | 8162  | 318386421                  |
| 2015              | 2.1       | 2,084  | 89,232,342         | 2.51                                         | 8057  | 320742673                  |
| 2016              | 2.1       | 2,142  | 89,814,929         | 2.56                                         | 8261  | 323071342                  |
| 2017              | 2.0       | 2,077  | 90,298,311         | 2.49                                         | 8091  | 325147121                  |
| <b>Stage IV</b>   |           |        |                    |                                              |       |                            |
| 2010              | 19.8      | 17,370 | 86,141,302         | 21.73                                        | 67203 | 309326085                  |
| 2011              | 18.8      | 16,947 | 86,786,305         | 21.03                                        | 65530 | 311580009                  |
| 2012              | 18.7      | 17,329 | 87,413,119         | 21.32                                        | 66907 | 313874218                  |
| 2013              | 18.2      | 17,269 | 88,004,080         | 21                                           | 66383 | 316057727                  |
| 2014              | 17.8      | 17,338 | 88,617,533         | 21                                           | 66873 | 318386421                  |
| 2015              | 17.2      | 17,212 | 89,232,342         | 20.53                                        | 65852 | 320742673                  |
| 2016              | 16.7      | 17,043 | 89,814,929         | 20.22                                        | 65313 | 323071342                  |
| 2017              | 15.8      | 16,622 | 90,298,311         | 19.59                                        | 63703 | 325147121                  |
| <b>Age &lt;65</b> |           |        |                    |                                              |       |                            |

|                   |     |       |            |      |       |           |
|-------------------|-----|-------|------------|------|-------|-----------|
| <b>Stage I</b>    |     |       |            |      |       |           |
| 2010              | 2.6 | 2,363 | 75,737,114 | 3.32 | 8920  | 268847303 |
| 2011              | 2.4 | 2,319 | 76,128,974 | 3.25 | 8789  | 270227060 |
| 2012              | 2.5 | 2,361 | 76,283,517 | 3.29 | 8909  | 270738079 |
| 2013              | 2.4 | 2,351 | 76,471,427 | 3.27 | 8884  | 271419209 |
| 2014              | 2.4 | 2,382 | 76,676,251 | 3.3  | 8971  | 272216636 |
| 2015              | 2.7 | 2,678 | 76,880,727 | 3.69 | 10066 | 273074977 |
| 2016              | 2.6 | 2,675 | 77,058,461 | 3.67 | 10061 | 273847358 |
| 2017              | 2.6 | 2,723 | 77,141,926 | 3.72 | 10211 | 274353198 |
| <b>Stage II</b>   |     |       |            |      |       |           |
| 2010              | 1.1 | 976   | 75,737,114 | 1.38 | 3716  | 268847303 |
| 2011              | 1.1 | 1,042 | 76,128,974 | 1.47 | 3975  | 270227060 |
| 2012              | 1.0 | 952   | 76,283,517 | 1.34 | 3623  | 270738079 |
| 2013              | 1.0 | 980   | 76,471,427 | 1.37 | 3705  | 271419209 |
| 2014              | 0.9 | 925   | 76,676,251 | 1.28 | 3484  | 272216636 |
| 2015              | 0.9 | 880   | 76,880,727 | 1.21 | 3310  | 273074977 |
| 2016              | 0.9 | 892   | 77,058,461 | 1.23 | 3381  | 273847358 |
| 2017              | 0.8 | 850   | 77,141,926 | 1.17 | 3202  | 274353198 |
| <b>Stage IIIA</b> |     |       |            |      |       |           |
| 2010              | 1.6 | 1,498 | 75,737,114 | 2.11 | 5678  | 268847303 |
| 2011              | 1.7 | 1,580 | 76,128,974 | 2.22 | 6000  | 270227060 |
| 2012              | 1.6 | 1,532 | 76,283,517 | 2.14 | 5801  | 270738079 |
| 2013              | 1.5 | 1,473 | 76,471,427 | 2.05 | 5576  | 271419209 |
| 2014              | 1.5 | 1,528 | 76,676,251 | 2.12 | 5778  | 272216636 |
| 2015              | 1.5 | 1,462 | 76,880,727 | 2.02 | 5517  | 273074977 |
| 2016              | 1.5 | 1,480 | 77,058,461 | 2.04 | 5574  | 273847358 |
| 2017              | 1.4 | 1,486 | 77,141,926 | 2.04 | 5600  | 274353198 |
| <b>Stage IIIB</b> |     |       |            |      |       |           |
| 2010              | 0.9 | 794   | 75,737,114 | 1.11 | 2994  | 268847303 |
| 2011              | 0.9 | 824   | 76,128,974 | 1.15 | 3116  | 270227060 |
| 2012              | 0.8 | 781   | 76,283,517 | 1.09 | 2953  | 270738079 |
| 2013              | 0.8 | 785   | 76,471,427 | 1.09 | 2958  | 271419209 |
| 2014              | 0.8 | 784   | 76,676,251 | 1.08 | 2945  | 272216636 |
| 2015              | 0.8 | 753   | 76,880,727 | 1.03 | 2825  | 273074977 |
| 2016              | 0.8 | 766   | 77,058,461 | 1.06 | 2890  | 273847358 |
| 2017              | 0.7 | 704   | 77,141,926 | 0.97 | 2668  | 274353198 |
| <b>Stage IV</b>   |     |       |            |      |       |           |
| 2010              | 6.8 | 6,224 | 75,737,114 | 8.65 | 23247 | 268847303 |
| 2011              | 6.7 | 6,240 | 76,128,974 | 8.63 | 23334 | 270227060 |
| 2012              | 6.6 | 6,247 | 76,283,517 | 8.63 | 23377 | 270738079 |
| 2013              | 6.5 | 6,181 | 76,471,427 | 8.45 | 22944 | 271419209 |
| 2014              | 6.3 | 6,103 | 76,676,251 | 8.35 | 22717 | 272216636 |
| 2015              | 6.0 | 5,955 | 76,880,727 | 8.1  | 22113 | 273074977 |
| 2016              | 5.8 | 5,800 | 77,058,461 | 7.84 | 21456 | 273847358 |
| 2017              | 5.4 | 5,480 | 77,141,926 | 7.39 | 20267 | 274353198 |

|                |      |       |            |       |       |          |
|----------------|------|-------|------------|-------|-------|----------|
| <b>Age ≥65</b> |      |       |            |       |       |          |
| <b>Stage I</b> |      |       |            |       |       |          |
| 2010           | 60.2 | 6,076 | 10,404,188 | 60.26 | 24394 | 40478782 |
| 2011           | 61.2 | 6,333 | 10,657,331 | 60.91 | 25189 | 41352949 |
| 2012           | 59.9 | 6,407 | 11,129,602 | 59.1  | 25492 | 43136139 |

|                   |       |        |            |        |       |          |
|-------------------|-------|--------|------------|--------|-------|----------|
| <b>2013</b>       | 61.5  | 6,801  | 11,532,653 | 60.66  | 27078 | 44638518 |
| <b>2014</b>       | 60.8  | 6,965  | 11,941,282 | 59.91  | 27660 | 46169785 |
| <b>2015</b>       | 62.2  | 7,335  | 12,351,615 | 61.1   | 29126 | 47667696 |
| <b>2016</b>       | 63.4  | 7,711  | 12,756,468 | 62.34  | 30686 | 49223984 |
| <b>2017</b>       | 65.2  | 8,223  | 13,156,385 | 64.23  | 32627 | 50793923 |
| <b>Stage II</b>   |       |        |            |        |       |          |
| <b>2010</b>       | 23.3  | 2,357  | 10,404,188 | 23.3   | 9433  | 40478782 |
| <b>2011</b>       | 23.1  | 2,390  | 10,657,331 | 23.04  | 9529  | 41352949 |
| <b>2012</b>       | 22.2  | 2,372  | 11,129,602 | 21.86  | 9427  | 43136139 |
| <b>2013</b>       | 22.0  | 2,433  | 11,532,653 | 21.51  | 9602  | 44638518 |
| <b>2014</b>       | 20.9  | 2,393  | 11,941,282 | 20.72  | 9566  | 46169785 |
| <b>2015</b>       | 20.7  | 2,432  | 12,351,615 | 20.29  | 9670  | 47667696 |
| <b>2016</b>       | 19.6  | 2,370  | 12,756,468 | 19.15  | 9426  | 49223984 |
| <b>2017</b>       | 18.0  | 2,271  | 13,156,385 | 17.73  | 9005  | 50793923 |
| <b>Stage IIIA</b> |       |        |            |        |       |          |
| <b>2010</b>       | 31.1  | 3,159  | 10,404,188 | 31.1   | 12590 | 40478782 |
| <b>2011</b>       | 30.9  | 3,185  | 10,657,331 | 30.65  | 12673 | 41352949 |
| <b>2012</b>       | 30.4  | 3,272  | 11,129,602 | 30.09  | 12981 | 43136139 |
| <b>2013</b>       | 28.9  | 3,205  | 11,532,653 | 28.53  | 12737 | 44638518 |
| <b>2014</b>       | 28.9  | 3,303  | 11,941,282 | 28.42  | 13122 | 46169785 |
| <b>2015</b>       | 27.6  | 3,277  | 12,351,615 | 27.22  | 12977 | 47667696 |
| <b>2016</b>       | 27.4  | 3,350  | 12,756,468 | 27     | 13290 | 49223984 |
| <b>2017</b>       | 27.3  | 3,467  | 13,156,385 | 26.92  | 13672 | 50793923 |
| <b>Stage IIIB</b> |       |        |            |        |       |          |
| <b>2010</b>       | 12.1  | 1,228  | 10,404,188 | 11.99  | 4855  | 40478782 |
| <b>2011</b>       | 12.5  | 1,297  | 10,657,331 | 12.33  | 5099  | 41352949 |
| <b>2012</b>       | 12.6  | 1,357  | 11,129,602 | 12.39  | 5346  | 43136139 |
| <b>2013</b>       | 11.2  | 1,256  | 11,532,653 | 11.17  | 4985  | 44638518 |
| <b>2014</b>       | 11.6  | 1,327  | 11,941,282 | 11.3   | 5217  | 46169785 |
| <b>2015</b>       | 11.2  | 1,331  | 12,351,615 | 10.97  | 5231  | 47667696 |
| <b>2016</b>       | 11.3  | 1,376  | 12,756,468 | 10.91  | 5371  | 49223984 |
| <b>2017</b>       | 10.8  | 1,373  | 13,156,385 | 10.68  | 5423  | 50793923 |
| <b>Stage IV</b>   |       |        |            |        |       |          |
| <b>2010</b>       | 109.5 | 11,146 | 10,404,188 | 108.59 | 43955 | 40478782 |
| <b>2011</b>       | 102.7 | 10,707 | 10,657,331 | 102.04 | 42196 | 41352949 |
| <b>2012</b>       | 102.5 | 11,082 | 11,129,602 | 100.91 | 43530 | 43136139 |
| <b>2013</b>       | 99.3  | 11,088 | 11,532,653 | 97.31  | 43438 | 44638518 |
| <b>2014</b>       | 97.4  | 11,235 | 11,941,282 | 95.64  | 44156 | 46169785 |
| <b>2015</b>       | 94.6  | 11,257 | 12,351,615 | 91.76  | 43739 | 47667696 |
| <b>2016</b>       | 91.8  | 11,243 | 12,756,468 | 89.1   | 43857 | 49223984 |
| <b>2017</b>       | 87.7  | 11,142 | 13,156,385 | 85.51  | 43436 | 50793923 |

Rates are per 100,000. NSCLC, non-small-cell lung cancer; US, United States; y, years.

<sup>a</sup>Based on SEER-NCPR

eTable 4. Prevalence of NSCLC in the US, 2010-2016 (Unadjusted)

|                                 | SEER-18    |         |                    | SEER-18 prevalence projected to US population |         |                            |
|---------------------------------|------------|---------|--------------------|-----------------------------------------------|---------|----------------------------|
|                                 | Prevalence | N       | SEER-18 Population | Prevalence                                    | N       | US Population <sup>a</sup> |
| <b>Overall (2010–2016)</b>      |            |         |                    |                                               |         |                            |
| 2010                            | 162.0      | 139,574 | 86,141,302         | 175.34                                        | 542,367 | 309,326,085                |
| 2011                            | 165.78     | 143,876 | 86,786,305         | 179.15                                        | 558,209 | 311,580,009                |
| 2012                            | 169.80     | 148,426 | 87,413,119         | 183.19                                        | 574,995 | 313,874,218                |
| 2013                            | 173.37     | 152,572 | 88,004,080         | 186.58                                        | 589,710 | 316,057,727                |
| 2014                            | 177.00     | 156,849 | 88,617,533         | 190.22                                        | 605,649 | 318,386,421                |
| 2015                            | 181.12     | 161,620 | 89,232,342         | 194.12                                        | 622,637 | 320,742,673                |
| 2016                            | 185.18     | 166,320 | 89,814,929         | 198.25                                        | 640,488 | 323,071,342                |
| <b>Age &lt;65 y (2010–2016)</b> |            |         |                    |                                               |         |                            |
| 2010                            | 73.27      | 55,491  | 75,737,114         | 77.50                                         | 208,363 | 268,847,303                |
| 2011                            | 75.27      | 57,300  | 76,128,974         | 79.60                                         | 215,091 | 270,227,060                |
| 2012                            | 77.02      | 58,755  | 76,283,517         | 81.36                                         | 220,282 | 270,738,079                |
| 2013                            | 78.71      | 60,194  | 76,471,427         | 82.94                                         | 225,129 | 271,419,209                |
| 2014                            | 80.39      | 61,641  | 76,676,251         | 84.56                                         | 230,174 | 272,216,636                |
| 2015                            | 82.25      | 63,233  | 76,880,727         | 86.33                                         | 235,734 | 273,074,977                |
| 2016                            | 83.85      | 64,613  | 77,058,461         | 87.86                                         | 240,612 | 273,847,358                |
| <b>Age ≥65 y (2010–2016)</b>    |            |         |                    |                                               |         |                            |
| 2010                            | 808.16     | 84,083  | 10,404,188         | 825.13                                        | 334,004 | 40,478,782                 |
| 2011                            | 812.36     | 86,576  | 10,657,331         | 829.73                                        | 343,118 | 41,352,949                 |
| 2012                            | 805.70     | 89,671  | 11,129,602         | 822.31                                        | 354,714 | 43,136,139                 |
| 2013                            | 801.01     | 92,378  | 11,532,653         | 816.74                                        | 364,582 | 44,638,518                 |
| 2014                            | 797.30     | 95,208  | 11,941,282         | 813.25                                        | 375,476 | 46,169,785                 |
| 2015                            | 796.55     | 98,387  | 12,351,615         | 811.67                                        | 386,903 | 47,667,696                 |
| 2016                            | 797.30     | 101,707 | 12,756,468         | 812.36                                        | 399,876 | 49,223,984                 |
| <b>Men (2010–2016)</b>          |            |         |                    |                                               |         |                            |
| 2010                            | 160.58     | 68,249  | 42,502,679         | 174.06                                        | 264,711 | 152,077,018                |
| 2011                            | 162.73     | 69,681  | 42,818,861         | 176.13                                        | 269,858 | 153,211,825                |
| 2012                            | 165.19     | 71,261  | 43,137,519         | 178.47                                        | 275,558 | 154,396,283                |
| 2013                            | 166.76     | 72,429  | 43,433,326         | 179.63                                        | 279,358 | 155,514,347                |
| 2014                            | 168.48     | 73,702  | 43,744,472         | 181.27                                        | 284,043 | 156,697,642                |
| 2015                            | 171.35     | 75,495  | 44,059,074         | 183.76                                        | 290,180 | 157,910,775                |
| 2016                            | 173.46     | 76,934  | 44,353,041         | 185.81                                        | 295,597 | 159,088,102                |
| <b>Women (2010–2016)</b>        |            |         |                    |                                               |         |                            |
| 2010                            | 163.44     | 71,325  | 43,638,623         | 176.57                                        | 277,657 | 157,249,067                |
| 2011                            | 168.75     | 74,195  | 43,967,444         | 182.08                                        | 288,351 | 158,368,184                |
| 2012                            | 174.28     | 77,165  | 44,275,600         | 187.76                                        | 299,438 | 159,477,935                |
| 2013                            | 179.81     | 80,143  | 44,570,754         | 193.31                                        | 310,353 | 160,543,380                |
| 2014                            | 185.29     | 83,147  | 44,873,061         | 198.90                                        | 321,607 | 161,688,779                |
| 2015                            | 190.65     | 86,125  | 45,173,268         | 204.17                                        | 332,457 | 162,831,898                |
| 2016                            | 196.62     | 89,386  | 45,461,888         | 210.32                                        | 344,890 | 163,983,240                |

Rates are per 100,000. NSCLC, non-small-cell lung cancer; US, United States; y, years.

<sup>a</sup>Based on SEER-NCPDR

eTable 5. Initial Treatment for NSCLC (SEER-18, 2016)

|                     | N      | No Treatment  | Any Treatment  |                |                | Single Treatment |               |                   |                | Multiple Treatments   |                            |
|---------------------|--------|---------------|----------------|----------------|----------------|------------------|---------------|-------------------|----------------|-----------------------|----------------------------|
|                     |        |               | Surgery        | Chemotherapy   | Radiation      | Only 1 Treatment | Surgery Only  | Chemotherapy Only | Radiation Only | More than 1 Treatment | Chemotherapy and Radiation |
| <b>Overall</b>      |        |               |                |                |                |                  |               |                   |                |                       |                            |
| 2010                | 37,878 | 8,971 (23.7%) | 10,656 (28.1%) | 15,805 (41.7%) | 14,351 (37.9%) | 18,073 (47.7%)   | 7,525 (19.9%) | 5,310 (14.0%)     | 5,238 (13.8%)  | 10,834 (28.6%)        | 8,774 (23.2%)              |
| 2011                | 38,036 | 8,935 (23.5%) | 10,642 (28.0%) | 15,803 (41.5%) | 14,483 (38.1%) | 18,305 (48.1%)   | 7,551 (19.9%) | 5,354 (14.1%)     | 5,400 (14.2%)  | 10,796 (28.4%)        | 8,736 (23.0%)              |
| 2012                | 38,227 | 9,140 (23.9%) | 10,339 (27.0%) | 15,813 (41.4%) | 14,812 (38.7%) | 18,199 (47.6%)   | 7,333 (19.2%) | 5,269 (13.8%)     | 5,597 (14.6%)  | 10,888 (28.5%)        | 8,871 (23.2%)              |
| 2013                | 38,280 | 8,697 (22.7%) | 10,470 (27.4%) | 16,039 (41.9%) | 15,003 (39.2%) | 18,603 (48.6%)   | 7,444 (19.4%) | 5,383 (14.1%)     | 5,776 (15.1%)  | 10,980 (28.7%)        | 8,903 (23.3%)              |
| 2014                | 38,487 | 8,824 (22.9%) | 10,125 (26.3%) | 16,317 (42.4%) | 15,321 (39.8%) | 18,499 (48.1%)   | 7,159 (18.6%) | 5,443 (14.1%)     | 5,897 (15.3%)  | 11,164 (29.0%)        | 9,134 (23.7%)              |
| 2015                | 38,719 | 8,703 (22.5%) | 10,259 (26.5%) | 16,128 (41.7%) | 15,409 (39.8%) | 19,119 (49.4%)   | 7,370 (19.0%) | 5,506 (14.2%)     | 6,243 (16.1%)  | 10,897 (28.1%)        | 8,891 (23.0%)              |
| 2016                | 38,692 | 8,792 (22.7%) | 10,584 (27.4%) | 15,671 (40.5%) | 15,219 (39.3%) | 19,163 (49.5%)   | 7,636 (19.7%) | 5,173 (13.4%)     | 6,354 (16.4%)  | 10,737 (27.7%)        | 8,626 (22.3%)              |
| <b>Age &lt;65 y</b> |        |               |                |                |                |                  |               |                   |                |                       |                            |
| 2010                | 12,347 | 1,960 (15.9%) | 3,762 (30.5%)  | 6,633 (53.7%)  | 5,466 (44.3%)  | 5,473 (44.3%)    | 2,340 (19.0%) | 1,816 (14.7%)     | 1,317 (10.7%)  | 4,914 (39.8%)         | 4,052 (32.8%)              |
| 2011                | 12,549 | 2,076 (16.5%) | 3,674 (29.3%)  | 6,820 (54.3%)  | 5,499 (43.8%)  | 5,485 (43.7%)    | 2,256 (18.0%) | 1,940 (15.5%)     | 1,289 (10.3%)  | 4,988 (39.7%)         | 4,102 (32.7%)              |
| 2012                | 12,288 | 2,101 (17.1%) | 3,572 (29.1%)  | 6,580 (53.5%)  | 5,353 (43.6%)  | 5,381 (43.8%)    | 2,193 (17.8%) | 1,879 (15.3%)     | 1,309 (10.7%)  | 4,806 (39.1%)         | 3,939 (32.1%)              |
| 2013                | 12,177 | 1,957 (16.1%) | 3,532 (29.0%)  | 6,665 (54.7%)  | 5,352 (44.0%)  | 5,341 (43.9%)    | 2,180 (17.9%) | 1,884 (15.5%)     | 1,277 (10.5%)  | 4,879 (40.1%)         | 3,977 (32.7%)              |
| 2014                | 12,121 | 1,969 (16.2%) | 3,362 (27.7%)  | 6,722 (55.5%)  | 5,388 (44.5%)  | 5,296 (43.7%)    | 2,112 (17.4%) | 1,951 (16.1%)     | 1,233 (10.2%)  | 4,856 (40.1%)         | 4,070 (33.6%)              |
| 2015                | 12,046 | 1,917 (15.9%) | 3,538 (29.4%)  | 6,429 (53.4%)  | 5,191 (43.1%)  | 5,509 (45.7%)    | 2,340 (19.4%) | 1,890 (15.7%)     | 1,279 (10.6%)  | 4,620 (38.4%)         | 3,831 (31.8%)              |
| 2016                | 11,859 | 1,975 (16.7%) | 3,629 (30.6%)  | 6,132 (51.7%)  | 4,988 (42.1%)  | 5,409 (45.6%)    | 2,375 (20.0%) | 1,736 (14.6%)     | 1,298 (10.9%)  | 4,475 (37.7%)         | 3,611 (30.4%)              |
| <b>Age ≥65 y</b>    |        |               |                |                |                |                  |               |                   |                |                       |                            |
| 2010                | 25,531 | 7,011 (27.5%) | 6,894 (27.0%)  | 9,172 (35.9%)  | 8,885 (34.8%)  | 12,600 (49.4%)   | 5,185 (20.3%) | 3,494 (13.7%)     | 3,921 (15.4%)  | 5,920 (23.2%)         | 4,722 (18.5%)              |
| 2011                | 25,487 | 6,859 (26.9%) | 6,968 (27.3%)  | 8,983 (35.2%)  | 8,984 (35.2%)  | 12,820 (50.3%)   | 5,295 (20.8%) | 3,414 (13.4%)     | 4,111 (16.1%)  | 5,808 (22.8%)         | 4,634 (18.2%)              |
| 2012                | 25,939 | 7,039 (27.1%) | 6,767 (26.1%)  | 9,233 (35.6%)  | 9,459 (36.5%)  | 12,818 (49.4%)   | 5,140 (19.8%) | 3,390 (13.1%)     | 4,288 (16.5%)  | 6,082 (23.4%)         | 4,932 (19.0%)              |
| 2013                | 26,103 | 6,740 (25.8%) | 6,938 (26.6%)  | 9,374 (35.9%)  | 9,651 (37.0%)  | 13,262 (50.8%)   | 5,264 (20.2%) | 3,499 (13.4%)     | 4,499 (17.2%)  | 6,101 (23.4%)         | 4,926 (18.9%)              |
| 2014                | 26,366 | 6,855 (26.0%) | 6,763 (25.7%)  | 9,595 (36.4%)  | 9,933 (37.7%)  | 13,203 (50.1%)   | 5,047 (19.1%) | 3,492 (13.2%)     | 4,664 (17.7%)  | 6,308 (23.9%)         | 5,064 (19.2%)              |
| 2015                | 26,673 | 6,786 (25.4%) | 6,721 (25.2%)  | 9,699 (36.4%)  | 10,218 (38.3%) | 13,610 (51.0%)   | 5,030 (18.9%) | 3,616 (13.6%)     | 4,964 (18.6%)  | 6,277 (23.5%)         | 5,060 (19.0%)              |
| 2016                | 26,833 | 6,817 (25.4%) | 6,955 (25.9%)  | 9,539 (35.5%)  | 10,231 (38.1%) | 13,754 (51.3%)   | 5,261 (19.6%) | 3,437 (12.8%)     | 5,056 (18.8%)  | 6,262 (23.3%)         | 5,015 (18.7%)              |
| <b>Men</b>          |        |               |                |                |                |                  |               |                   |                |                       |                            |
| 2010                | 20,293 | 4,960 (24.4%) | 5,178 (25.5%)  | 8,739 (43.1%)  | 7,985 (39.3%)  | 9,329 (46.0%)    | 3,547 (17.5%) | 2,921 (14.4%)     | 2,861 (14.1%)  | 6,004 (29.6%)         | 4,938 (24.3%)              |
| 2011                | 20,147 | 4,846 (24.1%) | 5,084 (25.2%)  | 8,676 (43.1%)  | 8,091 (40.2%)  | 9,326 (46.3%)    | 3,461 (17.2%) | 2,879 (14.3%)     | 2,986 (14.8%)  | 5,975 (29.7%)         | 4,927 (24.5%)              |
| 2012                | 20,156 | 5,009 (24.9%) | 4,937 (24.5%)  | 8,592 (42.6%)  | 8,136 (40.4%)  | 9,156 (45.4%)    | 3,356 (16.7%) | 2,799 (13.9%)     | 3,001 (14.9%)  | 5,991 (29.7%)         | 4,937 (24.5%)              |
| 2013                | 20,046 | 4,739 (23.6%) | 4,912 (24.5%)  | 8,688 (43.3%)  | 8,179 (40.8%)  | 9,348 (46.6%)    | 3,368 (16.8%) | 2,896 (14.4%)     | 3,084 (15.4%)  | 5,959 (29.7%)         | 4,928 (24.6%)              |
| 2014                | 19,936 | 4,618 (23.2%) | 4,686 (23.5%)  | 8,852 (44.4%)  | 8,345 (41.9%)  | 9,233 (46.3%)    | 3,205 (16.1%) | 2,910 (14.6%)     | 3,118 (15.6%)  | 6,085 (30.5%)         | 5,084 (25.5%)              |
| 2015                | 20,081 | 4,750 (23.7%) | 4,750 (23.7%)  | 8,688 (43.3%)  | 8,256 (41.1%)  | 9,442 (47.0%)    | 3,264 (16.3%) | 2,940 (14.6%)     | 3,238 (16.1%)  | 5,889 (29.3%)         | 4,877 (24.3%)              |
| 2016                | 19,790 | 4,702 (23.8%) | 4,784 (24.2%)  | 8,336 (42.1%)  | 8,130 (41.1%)  | 9,356 (47.3%)    | 3,297 (16.7%) | 2,723 (13.8%)     | 3,336 (16.9%)  | 5,732 (29.0%)         | 4,675 (23.6%)              |
| <b>Women</b>        |        |               |                |                |                |                  |               |                   |                |                       |                            |

|      |        |               |               |               |               |               |               |               |               |               |               |
|------|--------|---------------|---------------|---------------|---------------|---------------|---------------|---------------|---------------|---------------|---------------|
| 2010 | 17,585 | 4,011 (22.8%) | 5,478 (31.2%) | 7,066 (40.2%) | 6,366 (36.2%) | 8,744 (49.7%) | 3,978 (22.6%) | 2,389 (13.6%) | 2,377 (13.5%) | 4,830 (27.5%) | 3,836 (21.8%) |
| 2011 | 17,889 | 4,089 (22.9%) | 5,558 (31.1%) | 7,127 (39.8%) | 6,392 (35.7%) | 8,979 (50.2%) | 4,090 (22.9%) | 2,475 (13.8%) | 2,414 (13.5%) | 4,821 (26.9%) | 3,809 (21.3%) |
| 2012 | 18,071 | 4,131 (22.9%) | 5,402 (29.9%) | 7,221 (40.0%) | 6,676 (36.9%) | 9,043 (50.0%) | 3,977 (22.0%) | 2,470 (13.7%) | 2,596 (14.4%) | 4,897 (27.1%) | 3,934 (21.8%) |
| 2013 | 18,234 | 3,958 (21.7%) | 5,558 (30.5%) | 7,351 (40.3%) | 6,824 (37.4%) | 9,255 (50.8%) | 4,076 (22.4%) | 2,487 (13.6%) | 2,692 (14.8%) | 5,021 (27.5%) | 3,975 (21.8%) |
| 2014 | 18,551 | 4,206 (22.7%) | 5,439 (29.3%) | 7,465 (40.2%) | 6,976 (37.6%) | 9,266 (49.9%) | 3,954 (21.3%) | 2,533 (13.7%) | 2,779 (15.0%) | 5,079 (27.4%) | 4,050 (21.8%) |
| 2015 | 18,638 | 3,953 (21.2%) | 5,509 (29.6%) | 7,440 (39.9%) | 7,153 (38.4%) | 9,677 (51.9%) | 4,106 (22.0%) | 2,566 (13.8%) | 3,005 (16.1%) | 5,008 (26.9%) | 4,014 (21.5%) |
| 2016 | 18,902 | 4,090 (21.6%) | 5,800 (30.7%) | 7,335 (38.8%) | 7,089 (37.5%) | 9,807 (51.9%) | 4,339 (23.0%) | 2,450 (13.0%) | 3,018 (16.0%) | 5,005 (26.5%) | 3,951 (20.9%) |

Treatment data presented as n (%=n/N).

eTable 6. Initial treatment by stage and by age

|                          | N      | No Treatment | Surgery       | Chemotherapy  | Radiation     | Single Treatment |               |                   |                | Multiple Treatments   |                            |
|--------------------------|--------|--------------|---------------|---------------|---------------|------------------|---------------|-------------------|----------------|-----------------------|----------------------------|
|                          |        |              |               |               |               | Only 1 Treatment | Surgery Only  | Chemotherapy Only | Radiation Only | More than 1 Treatment | Chemotherapy and Radiation |
| <b>Stage I</b>           |        |              |               |               |               |                  |               |                   |                |                       |                            |
| 2010                     | 8,428  | 701 (8.3%)   | 6,125 (72.7%) | 813 (9.6%)    | 1,664 (19.7%) | 6,932 (82.2%)    | 5,567 (66.1%) | 128 (1.5%)        | 1,237 (14.7%)  | 795 (9.4%)            | 317 (3.8%)                 |
| 2011                     | 8,641  | 741 (8.6%)   | 6,102 (70.6%) | 775 (9.0%)    | 1,886 (21.8%) | 7,113 (82.3%)    | 5,550 (64.2%) | 120 (1.4%)        | 1,443 (16.7%)  | 787 (9.1%)            | 311 (3.6%)                 |
| 2012                     | 8,756  | 765 (8.7%)   | 6,004 (68.6%) | 683 (7.8%)    | 2,083 (23.8%) | 7,275 (83.1%)    | 5,521 (63.1%) | 109 (1.2%)        | 1,645 (18.8%)  | 716 (8.2%)            | 296 (3.4%)                 |
| 2013                     | 9,144  | 771 (8.4%)   | 6,251 (68.4%) | 739 (8.1%)    | 2,191 (24.0%) | 7,630 (83.4%)    | 5,716 (62.5%) | 114 (1.2%)        | 1,800 (19.7%)  | 743 (8.1%)            | 273 (3.0%)                 |
| 2014                     | 9,324  | 790 (8.5%)   | 6,075 (65.2%) | 699 (7.5%)    | 2,526 (27.1%) | 7,823 (83.9%)    | 5,605 (60.1%) | 99 (1.1%)         | 2,119 (22.7%)  | 711 (7.6%)            | 296 (3.2%)                 |
| 2015                     | 9,974  | 800 (8.0%)   | 6,343 (63.6%) | 762 (7.6%)    | 2,881 (28.9%) | 8,422 (84.4%)    | 5,834 (58.5%) | 120 (1.2%)        | 2,468 (24.7%)  | 752 (7.5%)            | 303 (3.0%)                 |
| 2016                     | 10,306 | 823 (8.0%)   | 6,472 (62.8%) | 736 (7.1%)    | 3,016 (29.3%) | 8,781 (85.2%)    | 6,012 (58.3%) | 123 (1.2%)        | 2,646 (25.7%)  | 702 (6.8%)            | 281 (2.7%)                 |
| <b>Stage I, &lt;65 y</b> |        |              |               |               |               |                  |               |                   |                |                       |                            |
| 2010                     | 2,361  | 100 (4.2%)   | 1,992 (84.4%) | 287 (12.2%)   | 305 (12.9%)   | 1,976 (83.7%)    | 1,768 (74.9%) | 26 (1.1%)         | 182 (7.7%)     | 285 (12.1%)           | 99 (4.2%)                  |
| 2011                     | 2,313  | 122 (5.3%)   | 1,930 (83.4%) | 283 (12.2%)   | 289 (12.5%)   | 1,912 (82.7%)    | 1,716 (74.2%) | 31 (1.3%)         | 165 (7.1%)     | 279 (12.1%)           | 97 (4.2%)                  |
| 2012                     | 2,357  | 137 (5.8%)   | 1,916 (81.3%) | 240 (10.2%)   | 340 (14.4%)   | 1,972 (83.7%)    | 1,731 (73.4%) | 29 (1.2%)         | 212 (9.0%)     | 248 (10.5%)           | 91 (3.9%)                  |
| 2013                     | 2,347  | 138 (5.9%)   | 1,900 (81.0%) | 282 (12.0%)   | 333 (14.2%)   | 1,930 (82.2%)    | 1,683 (71.7%) | 31 (1.3%)         | 216 (9.2%)     | 279 (11.9%)           | 89 (3.8%)                  |
| 2014                     | 2,377  | 147 (6.2%)   | 1,879 (79.0%) | 226 (9.5%)    | 383 (16.1%)   | 2,000 (84.1%)    | 1,706 (71.8%) | 26 (1.1%)         | 268 (11.3%)    | 230 (9.7%)            | 85 (3.6%)                  |
| 2015                     | 2,662  | 142 (5.3%)   | 2,109 (79.2%) | 273 (10.3%)   | 443 (16.6%)   | 2,249 (84.5%)    | 1,900 (71.4%) | 34 (1.3%)         | 315 (11.8%)    | 271 (10.2%)           | 96 (3.6%)                  |
| 2016                     | 2,665  | 159 (6.0%)   | 2,080 (78.0%) | 256 (9.6%)    | 438 (16.4%)   | 2,253 (84.5%)    | 1,884 (70.7%) | 27 (1.0%)         | 342 (12.8%)    | 253 (9.5%)            | 72 (2.7%)                  |
| <b>Stage I, ≥65 y</b>    |        |              |               |               |               |                  |               |                   |                |                       |                            |
| 2010                     | 6,067  | 601 (9.9%)   | 4,133 (68.1%) | 526 (8.7%)    | 1,359 (22.4%) | 4,956 (81.7%)    | 3,799 (62.6%) | 102 (1.7%)        | 1,055 (17.4%)  | 510 (8.4%)            | 218 (3.6%)                 |
| 2011                     | 6,328  | 619 (9.8%)   | 4,172 (65.9%) | 492 (7.8%)    | 1,597 (25.2%) | 5,201 (82.2%)    | 3,834 (60.6%) | 89 (1.4%)         | 1,278 (20.2%)  | 508 (8.0%)            | 214 (3.4%)                 |
| 2012                     | 6,399  | 628 (9.8%)   | 4,088 (63.9%) | 443 (6.9%)    | 1,743 (27.2%) | 5,303 (82.9%)    | 3,790 (59.2%) | 80 (1.3%)         | 1,433 (22.4%)  | 468 (7.3%)            | 205 (3.2%)                 |
| 2013                     | 6,797  | 633 (9.3%)   | 4,351 (64.0%) | 457 (6.7%)    | 1,858 (27.3%) | 5,700 (83.9%)    | 4,033 (59.3%) | 83 (1.2%)         | 1,584 (23.3%)  | 464 (6.8%)            | 184 (2.7%)                 |
| 2014                     | 6,947  | 643 (9.3%)   | 4,196 (60.4%) | 473 (6.8%)    | 2,143 (30.8%) | 5,823 (83.8%)    | 3,899 (56.1%) | 73 (1.1%)         | 1,851 (26.6%)  | 481 (6.9%)            | 211 (3.0%)                 |
| 2015                     | 7,312  | 658 (9.0%)   | 4,234 (57.9%) | 489 (6.7%)    | 2,438 (33.3%) | 6,173 (84.4%)    | 3,934 (53.8%) | 86 (1.2%)         | 2,153 (29.4%)  | 481 (6.6%)            | 207 (2.8%)                 |
| 2016                     | 7,641  | 664 (8.7%)   | 4,392 (57.5%) | 480 (6.3%)    | 2,578 (33.7%) | 6,528 (85.4%)    | 4,128 (54.0%) | 96 (1.3%)         | 2,304 (30.2%)  | 449 (5.9%)            | 209 (2.7%)                 |
| <b>Stage II</b>          |        |              |               |               |               |                  |               |                   |                |                       |                            |
| 2010                     | 3,331  | 440 (13.2%)  | 2,044 (61.4%) | 1,373 (41.2%) | 1,016 (30.5%) | 1,564 (47.0%)    | 1,093 (32.8%) | 124 (3.7%)        | 347 (10.4%)    | 1,327 (39.8%)         | 591 (17.7%)                |
| 2011                     | 3,428  | 436 (12.7%)  | 2,132 (62.2%) | 1,435 (41.9%) | 1,011 (29.5%) | 1,624 (47.4%)    | 1,157 (33.8%) | 143 (4.2%)        | 324 (9.5%)     | 1,368 (39.9%)         | 611 (17.8%)                |
| 2012                     | 3,325  | 419 (12.6%)  | 1,977 (59.5%) | 1,421 (42.7%) | 1,045 (31.4%) | 1,553 (46.7%)    | 1,027 (30.9%) | 134 (4.0%)        | 392 (11.8%)    | 1,353 (40.7%)         | 587 (17.7%)                |
| 2013                     | 3,406  | 442 (13.0%)  | 1,965 (57.7%) | 1,466 (43.0%) | 1,108 (32.5%) | 1,560 (45.8%)    | 1,010 (29.7%) | 135 (4.0%)        | 415 (12.2%)    | 1,404 (41.2%)         | 620 (18.2%)                |
| 2014                     | 3,314  | 453 (13.7%)  | 1,891 (57.1%) | 1,491 (45.0%) | 1,084 (32.7%) | 1,429 (43.1%)    | 915 (27.6%)   | 109 (3.3%)        | 405 (12.2%)    | 1,432 (43.2%)         | 629 (19.0%)                |
| 2015                     | 3,298  | 400 (12.1%)  | 1,815 (55.0%) | 1,474 (44.7%) | 1,124 (34.1%) | 1,521 (46.1%)    | 900 (27.3%)   | 144 (4.4%)        | 477 (14.5%)    | 1,377 (41.8%)         | 600 (18.2%)                |
| 2016                     | 3,238  | 396 (12.2%)  | 1,822 (56.3%) | 1,550 (47.9%) | 1,080 (33.4%) | 1,362 (42.1%)    | 818 (25.3%)   | 110 (3.4%)        | 434 (13.4%)    | 1,480 (45.7%)         | 606 (18.7%)                |

|                                 |       |             |               |               |               |               |             |            |             |               |               |  |
|---------------------------------|-------|-------------|---------------|---------------|---------------|---------------|-------------|------------|-------------|---------------|---------------|--|
| <b>Stage II,<br/>&lt;65 y</b>   |       |             |               |               |               |               |             |            |             |               |               |  |
| <b>2010</b>                     | 977   | 64 (6.6%)   | 740 (75.7%)   | 535 (54.8%)   | 268 (27.4%)   | 388 (39.7%)   | 325 (33.3%) | 27 (2.8%)  | 36 (3.7%)   | 525 (53.7%)   | 215 (22.0%)   |  |
| <b>2011</b>                     | 1,042 | 73 (7.0%)   | 757 (72.6%)   | 578 (55.5%)   | 316 (30.3%)   | 397 (38.1%)   | 320 (30.7%) | 30 (2.9%)  | 47 (4.5%)   | 572 (54.9%)   | 245 (23.5%)   |  |
| <b>2012</b>                     | 953   | 68 (7.1%)   | 689 (72.3%)   | 559 (58.7%)   | 258 (27.1%)   | 344 (36.1%)   | 258 (27.1%) | 35 (3.7%)  | 51 (5.4%)   | 541 (56.8%)   | 190 (19.9%)   |  |
| <b>2013</b>                     | 975   | 79 (8.1%)   | 701 (71.9%)   | 554 (56.8%)   | 255 (26.2%)   | 357 (36.6%)   | 271 (27.8%) | 36 (3.7%)  | 50 (5.1%)   | 539 (55.3%)   | 184 (18.9%)   |  |
| <b>2014</b>                     | 925   | 79 (8.5%)   | 662 (71.6%)   | 556 (60.1%)   | 259 (28.0%)   | 307 (33.2%)   | 233 (25.2%) | 29 (3.1%)  | 45 (4.9%)   | 539 (58.3%)   | 202 (21.8%)   |  |
| <b>2015</b>                     | 883   | 65 (7.4%)   | 614 (69.5%)   | 506 (57.3%)   | 228 (25.8%)   | 341 (38.6%)   | 257 (29.1%) | 36 (4.1%)  | 48 (5.4%)   | 477 (54.0%)   | 173 (19.6%)   |  |
| <b>2016</b>                     | 885   | 64 (7.2%)   | 646 (73.0%)   | 525 (59.3%)   | 216 (24.4%)   | 312 (35.3%)   | 238 (26.9%) | 29 (3.3%)  | 45 (5.1%)   | 509 (57.5%)   | 158 (17.9%)   |  |
| <b>Stage II,<br/>≥65 y</b>      |       |             |               |               |               |               |             |            |             |               |               |  |
| <b>2010</b>                     | 2,354 | 376 (16.0%) | 1,304 (55.4%) | 838 (35.6%)   | 748 (31.8%)   | 1,176 (50.0%) | 768 (32.6%) | 97 (4.1%)  | 311 (13.2%) | 802 (34.1%)   | 376 (16.0%)   |  |
| <b>2011</b>                     | 2,386 | 363 (15.2%) | 1,375 (57.6%) | 857 (35.9%)   | 695 (29.1%)   | 1,227 (51.4%) | 837 (35.1%) | 113 (4.7%) | 277 (11.6%) | 796 (33.4%)   | 366 (15.3%)   |  |
| <b>2012</b>                     | 2,372 | 351 (14.8%) | 1,288 (54.3%) | 862 (36.3%)   | 787 (33.2%)   | 1,209 (51.0%) | 769 (32.4%) | 99 (4.2%)  | 341 (14.4%) | 812 (34.2%)   | 397 (16.7%)   |  |
| <b>2013</b>                     | 2,431 | 363 (14.9%) | 1,264 (52.0%) | 912 (37.5%)   | 853 (35.1%)   | 1,203 (49.5%) | 739 (30.4%) | 99 (4.1%)  | 365 (15.0%) | 865 (35.6%)   | 436 (17.9%)   |  |
| <b>2014</b>                     | 2,389 | 374 (15.7%) | 1,229 (51.4%) | 935 (39.1%)   | 825 (34.5%)   | 1,122 (47.0%) | 682 (28.5%) | 80 (3.3%)  | 360 (15.1%) | 893 (37.4%)   | 427 (17.9%)   |  |
| <b>2015</b>                     | 2,415 | 335 (13.9%) | 1,201 (49.7%) | 968 (40.1%)   | 896 (37.1%)   | 1,180 (48.9%) | 643 (26.6%) | 108 (4.5%) | 429 (17.8%) | 900 (37.3%)   | 427 (17.7%)   |  |
| <b>2016</b>                     | 2,353 | 332 (14.1%) | 1,176 (50.0%) | 1,025 (43.6%) | 864 (36.7%)   | 1,050 (44.6%) | 580 (24.6%) | 81 (3.4%)  | 389 (16.5%) | 971 (41.3%)   | 448 (19.0%)   |  |
| <b>Stage IIIA</b>               |       |             |               |               |               |               |             |            |             |               |               |  |
| <b>2010</b>                     | 4,656 | 783 (16.8%) | 1,476 (31.7%) | 2,879 (61.8%) | 2,548 (54.7%) | 1,355 (29.1%) | 478 (10.3%) | 419 (9.0%) | 458 (9.8%)  | 2,518 (54.1%) | 2,032 (43.6%) |  |
| <b>2011</b>                     | 4,759 | 787 (16.5%) | 1,422 (29.9%) | 2,969 (62.4%) | 2,661 (55.9%) | 1,364 (28.7%) | 450 (9.5%)  | 422 (8.9%) | 492 (10.3%) | 2,608 (54.8%) | 2,108 (44.3%) |  |
| <b>2012</b>                     | 4,793 | 814 (17.0%) | 1,427 (29.8%) | 2,973 (62.0%) | 2,695 (56.2%) | 1,352 (28.2%) | 460 (9.6%)  | 394 (8.2%) | 498 (10.4%) | 2,627 (54.8%) | 2,149 (44.8%) |  |
| <b>2013</b>                     | 4,676 | 808 (17.3%) | 1,355 (29.0%) | 2,964 (63.4%) | 2,643 (56.5%) | 1,252 (26.8%) | 383 (8.2%)  | 396 (8.5%) | 473 (10.1%) | 2,616 (55.9%) | 2,122 (45.4%) |  |
| <b>2014</b>                     | 4,825 | 824 (17.1%) | 1,324 (27.4%) | 3,148 (65.2%) | 2,796 (57.9%) | 1,215 (25.2%) | 342 (7.1%)  | 404 (8.4%) | 469 (9.7%)  | 2,786 (57.7%) | 2,285 (47.4%) |  |
| <b>2015</b>                     | 4,726 | 770 (16.3%) | 1,325 (28.0%) | 3,076 (65.1%) | 2,770 (58.6%) | 1,216 (25.7%) | 381 (8.1%)  | 379 (8.0%) | 456 (9.6%)  | 2,740 (58.0%) | 2,271 (48.1%) |  |
| <b>2016</b>                     | 4,806 | 806 (16.8%) | 1,394 (29.0%) | 3,066 (63.8%) | 2,755 (57.3%) | 1,245 (25.9%) | 426 (8.9%)  | 346 (7.2%) | 473 (9.8%)  | 2,755 (57.3%) | 2,247 (46.8%) |  |
| <b>Stage IIIA,<br/>&lt;65 y</b> |       |             |               |               |               |               |             |            |             |               |               |  |
| <b>2010</b>                     | 1,498 | 151 (10.1%) | 591 (39.5%)   | 1,124 (75.0%) | 925 (61.7%)   | 315 (21.0%)   | 125 (8.3%)  | 112 (7.5%) | 78 (5.2%)   | 1,032 (68.9%) | 827 (55.2%)   |  |
| <b>2011</b>                     | 1,578 | 161 (10.2%) | 566 (35.9%)   | 1,214 (76.9%) | 988 (62.6%)   | 308 (19.5%)   | 98 (6.2%)   | 127 (8.0%) | 83 (5.3%)   | 1,109 (70.3%) | 883 (56.0%)   |  |
| <b>2012</b>                     | 1,526 | 172 (11.3%) | 567 (37.2%)   | 1,155 (75.7%) | 952 (62.4%)   | 293 (19.2%)   | 108 (7.1%)  | 111 (7.3%) | 74 (4.8%)   | 1,061 (69.5%) | 861 (56.4%)   |  |
| <b>2013</b>                     | 1,477 | 160 (10.8%) | 531 (36.0%)   | 1,126 (76.2%) | 886 (60.0%)   | 302 (20.4%)   | 111 (7.5%)  | 121 (8.2%) | 70 (4.7%)   | 1,015 (68.7%) | 806 (54.6%)   |  |
| <b>2014</b>                     | 1,528 | 167 (10.9%) | 462 (30.2%)   | 1,209 (79.1%) | 996 (65.2%)   | 275 (18.0%)   | 82 (5.4%)   | 130 (8.5%) | 63 (4.1%)   | 1,086 (71.1%) | 926 (60.6%)   |  |
| <b>2015</b>                     | 1,460 | 152 (10.4%) | 492 (33.7%)   | 1,123 (76.9%) | 942 (64.5%)   | 266 (18.2%)   | 106 (7.3%)  | 97 (6.6%)  | 63 (4.3%)   | 1,042 (71.4%) | 863 (59.1%)   |  |
| <b>2016</b>                     | 1,474 | 159 (10.8%) | 540 (36.6%)   | 1,110 (75.3%) | 900 (61.1%)   | 294 (19.9%)   | 126 (8.5%)  | 99 (6.7%)  | 69 (4.7%)   | 1,021 (69.3%) | 821 (55.7%)   |  |
| <b>Stage IIIA,<br/>≥65 y</b>    |       |             |               |               |               |               |             |            |             |               |               |  |
| <b>2010</b>                     | 3,158 | 632 (20.0%) | 885 (28.0%)   | 1,755 (55.6%) | 1,623 (51.4%) | 1,040 (32.9%) | 353 (11.2%) | 307 (9.7%) | 380 (12.0%) | 1,486 (47.1%) | 1,205 (38.2%) |  |
| <b>2011</b>                     | 3,181 | 626 (19.7%) | 856 (26.9%)   | 1,755 (55.2%) | 1,673 (52.6%) | 1,056 (33.2%) | 352 (11.1%) | 295 (9.3%) | 409 (12.9%) | 1,499 (47.1%) | 1,225 (38.5%) |  |
| <b>2012</b>                     | 3,267 | 642 (19.7%) | 860 (26.3%)   | 1,818 (55.6%) | 1,743 (53.4%) | 1,059 (32.4%) | 352 (10.8%) | 283 (8.7%) | 424 (13.0%) | 1,566 (47.9%) | 1,288 (39.4%) |  |



|                             |        |               |             |               |               |               |            |               |               |               |               |
|-----------------------------|--------|---------------|-------------|---------------|---------------|---------------|------------|---------------|---------------|---------------|---------------|
| <b>2013</b>                 | 3,199  | 648 (20.3%)   | 824 (25.8%) | 1,838 (57.5%) | 1,757 (54.9%) | 950 (29.7%)   | 272 (8.5%) | 275 (8.6%)    | 403 (12.6%)   | 1,601 (50.0%) | 1,316 (41.1%) |
| <b>2014</b>                 | 3,297  | 657 (19.9%)   | 862 (26.1%) | 1,939 (58.8%) | 1,800 (54.6%) | 940 (28.5%)   | 260 (7.9%) | 274 (8.3%)    | 406 (12.3%)   | 1,700 (51.6%) | 1,359 (41.2%) |
| <b>2015</b>                 | 3,266  | 618 (18.9%)   | 833 (25.5%) | 1,953 (59.8%) | 1,828 (56.0%) | 950 (29.1%)   | 275 (8.4%) | 282 (8.6%)    | 393 (12.0%)   | 1,698 (52.0%) | 1,408 (43.1%) |
| <b>2016</b>                 | 3,332  | 647 (19.4%)   | 854 (25.6%) | 1,956 (58.7%) | 1,855 (55.7%) | 951 (28.5%)   | 300 (9.0%) | 247 (7.4%)    | 404 (12.1%)   | 1,734 (52.0%) | 1,426 (42.8%) |
| <b>Stage IIIB</b>           |        |               |             |               |               |               |            |               |               |               |               |
| <b>2010</b>                 | 2,020  | 349 (17.3%)   | 139 (6.9%)  | 1,407 (69.7%) | 1,323 (65.5%) | 537 (26.6%)   | 22 (1.1%)  | 284 (14.1%)   | 231 (11.4%)   | 1,134 (56.1%) | 1,081 (53.5%) |
| <b>2011</b>                 | 2,123  | 387 (18.2%)   | 130 (6.1%)  | 1,470 (69.2%) | 1,375 (64.8%) | 554 (26.1%)   | 27 (1.3%)  | 299 (14.1%)   | 228 (10.7%)   | 1,182 (55.7%) | 1,136 (53.5%) |
| <b>2012</b>                 | 2,136  | 421 (19.7%)   | 118 (5.5%)  | 1,447 (67.7%) | 1,361 (63.7%) | 564 (26.4%)   | 16 (0.7%)  | 303 (14.2%)   | 245 (11.5%)   | 1,151 (53.9%) | 1,109 (51.9%) |
| <b>2013</b>                 | 2,038  | 343 (16.8%)   | 148 (7.3%)  | 1,440 (70.7%) | 1,330 (65.3%) | 546 (26.8%)   | 28 (1.4%)  | 299 (14.7%)   | 219 (10.7%)   | 1,149 (56.4%) | 1,103 (54.1%) |
| <b>2014</b>                 | 2,111  | 383 (18.1%)   | 123 (5.8%)  | 1,503 (71.2%) | 1,390 (65.8%) | 509 (24.1%)   | 17 (0.8%)  | 292 (13.8%)   | 200 (9.5%)    | 1,219 (57.7%) | 1,182 (56.0%) |
| <b>2015</b>                 | 2,077  | 392 (18.9%)   | 108 (5.2%)  | 1,466 (70.6%) | 1,341 (64.6%) | 513 (24.7%)   | 17 (0.8%)  | 299 (14.4%)   | 197 (9.5%)    | 1,172 (56.4%) | 1,139 (54.8%) |
| <b>2016</b>                 | 2,115  | 392 (18.5%)   | 154 (7.3%)  | 1,484 (70.2%) | 1,333 (63.0%) | 535 (25.3%)   | 44 (2.1%)  | 304 (14.4%)   | 187 (8.8%)    | 1,188 (56.2%) | 1,138 (53.8%) |
| <b>Stage IIIB, &lt;65 y</b> |        |               |             |               |               |               |            |               |               |               |               |
| <b>2010</b>                 | 794    | 90 (11.3%)    | 64 (8.1%)   | 631 (79.5%)   | 577 (72.7%)   | 171 (21.5%)   | 9 (1.1%)   | 101 (12.7%)   | 61 (7.7%)     | 533 (67.1%)   | 513 (64.6%)   |
| <b>2011</b>                 | 827    | 98 (11.9%)    | 67 (8.1%)   | 652 (78.8%)   | 601 (72.7%)   | 169 (20.4%)   | 14 (1.7%)  | 96 (11.6%)    | 59 (7.1%)     | 560 (67.7%)   | 538 (65.1%)   |
| <b>2012</b>                 | 779    | 106 (13.6%)   | 63 (8.1%)   | 615 (78.9%)   | 552 (70.9%)   | 153 (19.6%)   | 2 (0.3%)   | 97 (12.5%)    | 54 (6.9%)     | 520 (66.8%)   | 496 (63.7%)   |
| <b>2013</b>                 | 785    | 89 (11.3%)    | 81 (10.3%)  | 639 (81.4%)   | 567 (72.2%)   | 153 (19.5%)   | 9 (1.1%)   | 98 (12.5%)    | 46 (5.9%)     | 543 (69.2%)   | 519 (66.1%)   |
| <b>2014</b>                 | 784    | 101 (12.9%)   | 57 (7.3%)   | 631 (80.5%)   | 571 (72.8%)   | 146 (18.6%)   | 5 (0.6%)   | 95 (12.1%)    | 46 (5.9%)     | 537 (68.5%)   | 524 (66.8%)   |
| <b>2015</b>                 | 752    | 100 (13.3%)   | 49 (6.5%)   | 608 (80.9%)   | 534 (71.0%)   | 147 (19.5%)   | 4 (0.5%)   | 103 (13.7%)   | 40 (5.3%)     | 505 (67.2%)   | 494 (65.7%)   |
| <b>2016</b>                 | 761    | 114 (15.0%)   | 55 (7.2%)   | 596 (78.3%)   | 512 (67.3%)   | 153 (20.1%)   | 18 (2.4%)  | 102 (13.4%)   | 33 (4.3%)     | 494 (64.9%)   | 479 (62.9%)   |
| <b>Stage IIIB, ≥65 y</b>    |        |               |             |               |               |               |            |               |               |               |               |
| <b>2010</b>                 | 1,226  | 259 (21.1%)   | 75 (6.1%)   | 776 (63.3%)   | 746 (60.8%)   | 366 (29.9%)   | 13 (1.1%)  | 183 (14.9%)   | 170 (13.9%)   | 601 (49.0%)   | 568 (46.3%)   |
| <b>2011</b>                 | 1,296  | 289 (22.3%)   | 63 (4.9%)   | 818 (63.1%)   | 774 (59.7%)   | 385 (29.7%)   | 13 (1.0%)  | 203 (15.7%)   | 169 (13.0%)   | 622 (48.0%)   | 598 (46.1%)   |
| <b>2012</b>                 | 1,357  | 315 (23.2%)   | 55 (4.1%)   | 832 (61.3%)   | 809 (59.6%)   | 411 (30.3%)   | 14 (1.0%)  | 206 (15.2%)   | 191 (14.1%)   | 631 (46.5%)   | 613 (45.2%)   |
| <b>2013</b>                 | 1,253  | 254 (20.3%)   | 67 (5.3%)   | 801 (63.9%)   | 763 (60.9%)   | 393 (31.4%)   | 19 (1.5%)  | 201 (16.0%)   | 173 (13.8%)   | 606 (48.4%)   | 584 (46.6%)   |
| <b>2014</b>                 | 1,327  | 282 (21.3%)   | 66 (5.0%)   | 872 (65.7%)   | 819 (61.7%)   | 363 (27.4%)   | 12 (0.9%)  | 197 (14.8%)   | 154 (11.6%)   | 682 (51.4%)   | 658 (49.6%)   |
| <b>2015</b>                 | 1,325  | 292 (22.0%)   | 59 (4.5%)   | 858 (64.8%)   | 807 (60.9%)   | 366 (27.6%)   | 13 (1.0%)  | 196 (14.8%)   | 157 (11.8%)   | 667 (50.3%)   | 645 (48.7%)   |
| <b>2016</b>                 | 1,354  | 278 (20.5%)   | 99 (7.3%)   | 888 (65.6%)   | 821 (60.6%)   | 382 (28.2%)   | 26 (1.9%)  | 202 (14.9%)   | 154 (11.4%)   | 694 (51.3%)   | 659 (48.7%)   |
| <b>Stage IV</b>             |        |               |             |               |               |               |            |               |               |               |               |
| <b>2010</b>                 | 17,359 | 5,554 (32.0%) | 681 (3.9%)  | 8,772 (50.5%) | 7,280 (41.9%) | 7,053 (40.6%) | 235 (1.4%) | 4,096 (23.6%) | 2,722 (15.7%) | 4,752 (27.4%) | 4,482 (25.8%) |
| <b>2011</b>                 | 16,932 | 5,368 (31.7%) | 669 (4.0%)  | 8,597 (50.8%) | 7,003 (41.4%) | 7,042 (41.6%) | 246 (1.5%) | 4,131 (24.4%) | 2,665 (15.7%) | 4,522 (26.7%) | 4,282 (25.3%) |
| <b>2012</b>                 | 17,313 | 5,605 (32.4%) | 654 (3.8%)  | 8,785 (50.7%) | 7,176 (41.4%) | 6,966 (40.2%) | 212 (1.2%) | 4,116 (23.8%) | 2,638 (15.2%) | 4,742 (27.4%) | 4,465 (25.8%) |
| <b>2013</b>                 | 17,240 | 5,323 (30.9%) | 614 (3.6%)  | 8,956 (51.9%) | 7,290 (42.3%) | 7,121 (41.3%) | 212 (1.2%) | 4,227 (24.5%) | 2,682 (15.6%) | 4,796 (27.8%) | 4,541 (26.3%) |
| <b>2014</b>                 | 17,306 | 5,422 (31.3%) | 577 (3.3%)  | 9,076 (52.4%) | 7,152 (41.3%) | 7,102 (41.0%) | 186 (1.1%) | 4,368 (25.2%) | 2,548 (14.7%) | 4,782 (27.6%) | 4,530 (26.2%) |
| <b>2015</b>                 | 17,163 | 5,428 (31.6%) | 556 (3.2%)  | 9,005 (52.5%) | 6,971 (40.6%) | 7,078 (41.2%) | 164 (1.0%) | 4,414 (25.7%) | 2,500 (14.6%) | 4,657 (27.1%) | 4,405 (25.7%) |
| <b>2016</b>                 | 16,890 | 5,583 (33.1%) | 555 (3.3%)  | 8,563 (50.7%) | 6,785 (40.2%) | 6,850 (40.6%) | 186 (1.1%) | 4,167 (24.7%) | 2,497 (14.8%) | 4,457 (26.4%) | 4,227 (25.0%) |
| <b>Stage IV, &lt;65 y</b>   |        |               |             |               |               |               |            |               |               |               |               |

|                            |        |               |            |               |               |               |            |               |               |               |               |
|----------------------------|--------|---------------|------------|---------------|---------------|---------------|------------|---------------|---------------|---------------|---------------|
| <b>2010</b>                | 6,223  | 1,322 (21.2%) | 309 (5.0%) | 3,868 (62.2%) | 3,255 (52.3%) | 2,480 (39.9%) | 76 (1.2%)  | 1,479 (23.8%) | 925 (14.9%)   | 2,421 (38.9%) | 2,298 (36.9%) |
| <b>2011</b>                | 6,237  | 1,339 (21.5%) | 301 (4.8%) | 3,897 (62.5%) | 3,151 (50.5%) | 2,553 (40.9%) | 80 (1.3%)  | 1,579 (25.3%) | 894 (14.3%)   | 2,345 (37.6%) | 2,230 (35.8%) |
| <b>2012</b>                | 6,242  | 1,395 (22.3%) | 282 (4.5%) | 3,858 (61.8%) | 3,135 (50.2%) | 2,511 (40.2%) | 66 (1.1%)  | 1,551 (24.8%) | 894 (14.3%)   | 2,336 (37.4%) | 2,212 (35.4%) |
| <b>2013</b>                | 6,171  | 1,274 (20.6%) | 281 (4.6%) | 3,921 (63.5%) | 3,193 (51.7%) | 2,483 (40.2%) | 85 (1.4%)  | 1,539 (24.9%) | 859 (13.9%)   | 2,414 (39.1%) | 2,302 (37.3%) |
| <b>2014</b>                | 6,091  | 1,271 (20.9%) | 245 (4.0%) | 3,940 (64.7%) | 3,069 (50.4%) | 2,460 (40.4%) | 53 (0.9%)  | 1,613 (26.5%) | 794 (13.0%)   | 2,360 (38.7%) | 2,242 (36.8%) |
| <b>2015</b>                | 5,945  | 1,282 (21.6%) | 239 (4.0%) | 3,803 (64.0%) | 2,951 (49.6%) | 2,409 (40.5%) | 51 (0.9%)  | 1,574 (26.5%) | 784 (13.2%)   | 2,254 (37.9%) | 2,142 (36.0%) |
| <b>2016</b>                | 5,753  | 1,313 (22.8%) | 244 (4.2%) | 3,556 (61.8%) | 2,864 (49.8%) | 2,295 (39.9%) | 61 (1.1%)  | 1,439 (25.0%) | 795 (13.8%)   | 2,145 (37.3%) | 2,041 (35.5%) |
| <b>Stage IV,<br/>≥65 y</b> |        |               |            |               |               |               |            |               |               |               |               |
| <b>2010</b>                | 11,136 | 4,232 (38.0%) | 372 (3.3%) | 4,904 (44.0%) | 4,025 (36.1%) | 4,573 (41.1%) | 159 (1.4%) | 2,617 (23.5%) | 1,797 (16.1%) | 2,331 (20.9%) | 2,184 (19.6%) |
| <b>2011</b>                | 10,695 | 4,029 (37.7%) | 368 (3.4%) | 4,700 (43.9%) | 3,852 (36.0%) | 4,489 (42.0%) | 166 (1.6%) | 2,552 (23.9%) | 1,771 (16.6%) | 2,177 (20.4%) | 2,052 (19.2%) |
| <b>2012</b>                | 11,071 | 4,210 (38.0%) | 372 (3.4%) | 4,927 (44.5%) | 4,041 (36.5%) | 4,455 (40.2%) | 146 (1.3%) | 2,565 (23.2%) | 1,744 (15.8%) | 2,406 (21.7%) | 2,253 (20.4%) |
| <b>2013</b>                | 11,069 | 4,049 (36.6%) | 333 (3.0%) | 5,035 (45.5%) | 4,097 (37.0%) | 4,638 (41.9%) | 127 (1.1%) | 2,688 (24.3%) | 1,823 (16.5%) | 2,382 (21.5%) | 2,239 (20.2%) |
| <b>2014</b>                | 11,215 | 4,151 (37.0%) | 332 (3.0%) | 5,136 (45.8%) | 4,083 (36.4%) | 4,642 (41.4%) | 133 (1.2%) | 2,755 (24.6%) | 1,754 (15.6%) | 2,422 (21.6%) | 2,288 (20.4%) |
| <b>2015</b>                | 11,218 | 4,146 (37.0%) | 317 (2.8%) | 5,202 (46.4%) | 4,020 (35.8%) | 4,669 (41.6%) | 113 (1.0%) | 2,840 (25.3%) | 1,716 (15.3%) | 2,403 (21.4%) | 2,263 (20.2%) |
| <b>2016</b>                | 11,137 | 4,270 (38.3%) | 311 (2.8%) | 5,007 (45.0%) | 3,921 (35.2%) | 4,555 (40.9%) | 125 (1.1%) | 2,728 (24.5%) | 1,702 (15.3%) | 2,312 (20.8%) | 2,186 (19.6%) |

Treatment data presented as n (%=n/N).

**eTable 7. Incidence of Stage I NSCLC in patients ≥65 years of age and Medicare Part B CT scan proportions**

| Year | % year-on-year change in Stage I NSCLC incidence, ≥65 years* | Number of Medicare Part B patients receiving low dose CT scans (HCPCS code G0297)† | Medicare Part B lives‡ | Percent receiving low dose CT scans |
|------|--------------------------------------------------------------|------------------------------------------------------------------------------------|------------------------|-------------------------------------|
| 2010 | -                                                            | 0                                                                                  | 43,903,273             | 0.0000                              |
| 2011 | 1.08                                                         | 0                                                                                  | 44,936,829             | 0.0000                              |
| 2012 | -2.97                                                        | 0                                                                                  | 46,493,389             | 0.0000                              |
| 2013 | 2.64                                                         | 0                                                                                  | 47,959,444             | 0.0000                              |
| 2014 | -1.24                                                        | 0                                                                                  | 49,412,177             | 0.0000                              |
| 2015 | 1.99                                                         | 10,010                                                                             | 60,757,651             | 0.0165                              |
| 2016 | 2.03                                                         | 76,452                                                                             | 52,085,697             | 0.1468                              |
| 2017 | 3.03                                                         | 141,509                                                                            | 53,350,096             | 0.2652                              |
| 2018 | -                                                            | 208,309                                                                            | 54,689,754             | 0.3809                              |

\*Derived from eTable 3

†Part B National Summary Data File for each year, available from <https://www.cms.gov/Research-Statistics-Data-and-Systems/Downloadable-Public-Use-Files/Part-B-National-Summary-Data-File/Overview>

‡<https://www.cms.gov/files/document/2018-mdcr-enroll-ab-3.pdf>
